# Supplementary material for: Mineralogical and Geochemical Implications of Weathering Processes Responsible for Soil Generation in Mănăila Alpine Area (Tulgheş 3 Unit—Eastern Carpathians)
Source: MDPI journal article supplement (doi:10.3390/min12091161), 2022-09-14
Supplement: s1 [file s1]

Laboratorul de Mineralogie - Institutul Geologic al Romanie (Coupled TwoTheta/Theta)

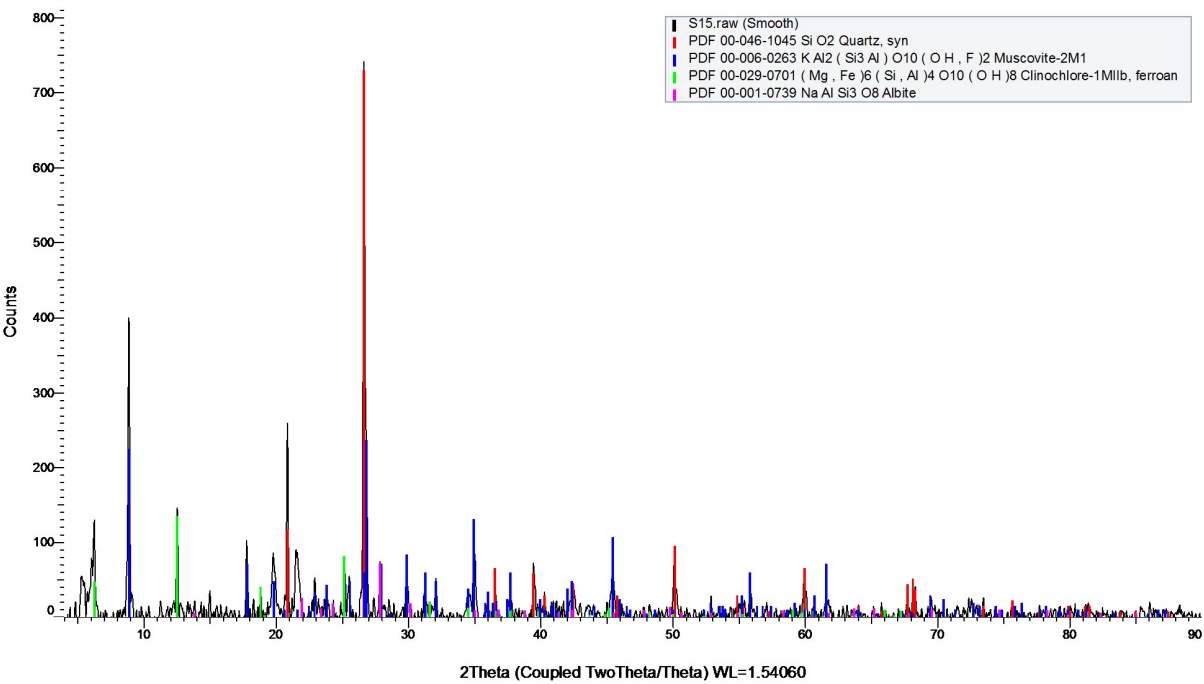

Figure S1: XRD powder pattern of sample S15.

Plagioclase index of alteration (Fedo, C.M.; Nesbitt, H.W.; Young, G.M. Unraveling the effects of potassium metasomatism in sedimentary rocks and paleosols, with implications for paleoweathering conditions and provenance. *Geology* **1995**, 23, 921–924. [https://doi.org/10.1130/00917613\(1995\)023<0921:UTEOPM>2.3.CO;2](https://doi.org/10.1130/00917613(1995)023<0921:UTEOPM>2.3.CO;2).)

$$PIA = [(Al_2O_3 - K_2O) * 100] / (Al_2O_3 + CaO + Na_2O - K_2O)$$

Na-plagioclase: quantitative data from XRD analyses

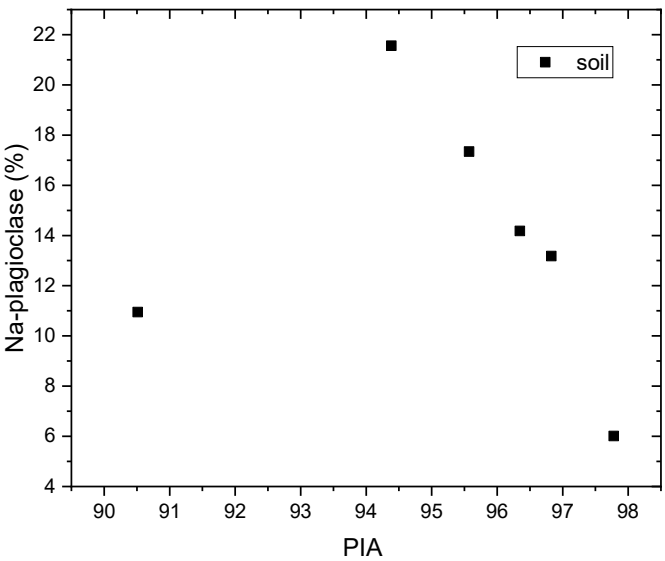

Figure S2: The relation trend between PIA and Na-Plg in soil from Mănăila area

Parker index of weathering (1970) (Parker, A. An index of weathering for silicate rocks. *Geol. Mag.* **1970**, 107, 501–504. <https://doi.org/10.1017/S0016756800058581>.)

$$WIP = (CaO/0.7) + (2*Na_2O/0.35) + (2*K_2O/0.25) + (MgO/0.9)*100$$

Chemical index of alteration (Nesbitt, H.W.; Young, G.M. Formation and diagenesis of weathering profiles. *J. Geol.* **1989**, 97, 129–147.)

$$CIA = (Al_2O_3 * 100) / (Al_2O_3 + CaO + Na_2O + K_2O)$$

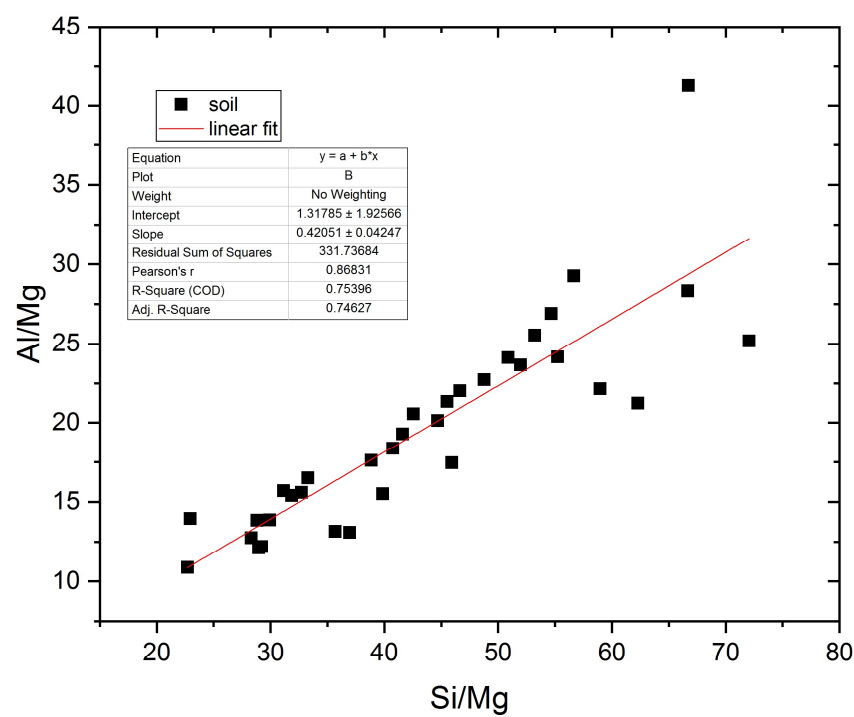

Figure S3: The relation between Si/Mg and Al/Mg molar ratios in Mănăila soil

Table S1. Correlations of major oxides of soil from Mănăila area

| oxides                         | SiO <sub>2</sub> | TiO <sub>2</sub> | Al <sub>2</sub> O <sub>3</sub> | Fe <sub>2</sub> O <sub>3</sub> | MgO   | MnO         | CaO   | Na <sub>2</sub> O | K <sub>2</sub> O | P <sub>2</sub> O <sub>5</sub> |
|--------------------------------|------------------|------------------|--------------------------------|--------------------------------|-------|-------------|-------|-------------------|------------------|-------------------------------|
| SiO <sub>2</sub>               | 1                |                  |                                |                                |       |             |       |                   |                  |                               |
| TiO <sub>2</sub>               | <b>-0.57</b>     | 1.00             |                                |                                |       |             |       |                   |                  |                               |
| Al <sub>2</sub> O <sub>3</sub> | -0.30            | 0.35             | 1.00                           |                                |       |             |       |                   |                  |                               |
| Fe <sub>2</sub> O <sub>3</sub> | <b>-0.63</b>     | <b>0.69</b>      | <b>0.55</b>                    | 1.00                           |       |             |       |                   |                  |                               |
| MgO                            | 0.23             | -0.16            | <b>0.32</b>                    | -0.08                          | 1.00  |             |       |                   |                  |                               |
| MnO                            | -0.39            | <b>0.70</b>      | <b>0.48</b>                    | <b>0.65</b>                    | 0.27  | 1.00        |       |                   |                  |                               |
| CaO                            | 0.17             | -0.03            | -0.39                          | -0.16                          | 0.05  | 0.27        | 1.00  |                   |                  |                               |
| Na <sub>2</sub> O              | -0.06            | -0.04            | -0.20                          | -0.29                          | -0.41 | -0.22       | -0.01 | 1.00              |                  |                               |
| <b>K<sub>2</sub>O</b>          | 0.27             | -0.19            | -0.04                          | -0.48                          | 0.26  | -0.11       | -0.23 | 0.01              | 1.00             |                               |
| P <sub>2</sub> O <sub>5</sub>  | -0.53            | <b>0.59</b>      | 0.27                           | <b>0.76</b>                    | -0.10 | <b>0.73</b> | 0.32  | -0.22             | -0.39            | 1.00                          |

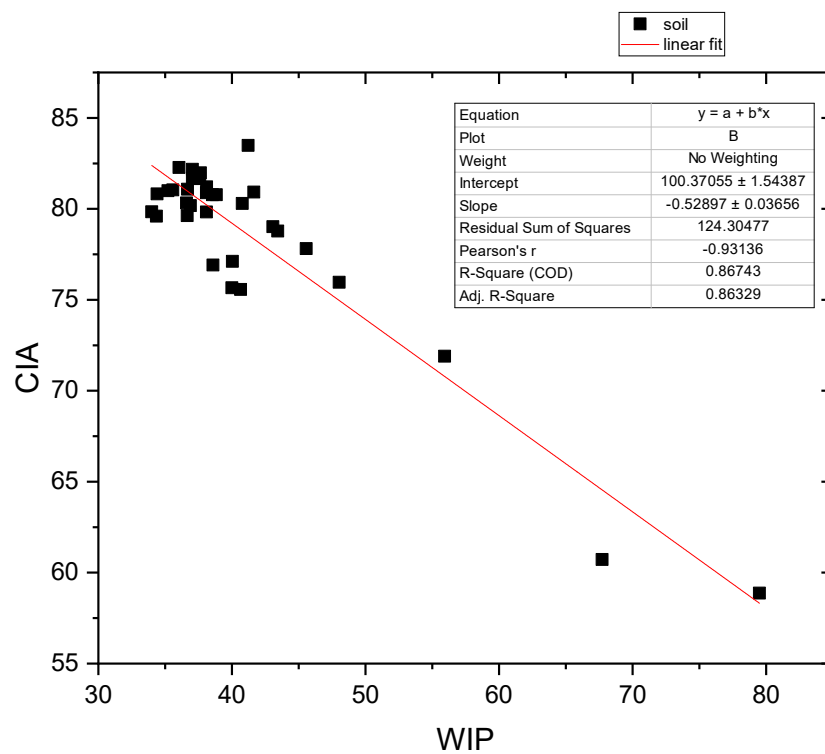

Figure S4: The relation between WIP and CIA in soil from Mănăila area
